# Supplementary material for: Influence of Belowground Biomass on Barrier-Island Evolution During Storms: A Computational Parameter Study
Source: Atypon-hosted journal article supplement (doi:10.1061/jwped5.wweng-2047), 2024-03-21
Supplement: supplemental materials_jwped5.wweng-2047_irish.pdf [file supplemental%20materials_jwped5.wweng-2047_irish.pdf]

## SUPPLEMENTAL MATERIALS

*ASCE Journal of Waterway, Port, Coastal, and Ocean Engineering*

# Influence of Belowground Biomass on Barrier- Island Evolution during Storms: A Computational Parameter Study

Jennifer L. Irish, Wei Cheng, Robert Weiss, Stephanie M. Patch,  
and Megan A. Beever

**DOI:** 10.1061/JWPED5.WWENG-2047

© ASCE 2024

[www.ascelibrary.org](http://www.ascelibrary.org)

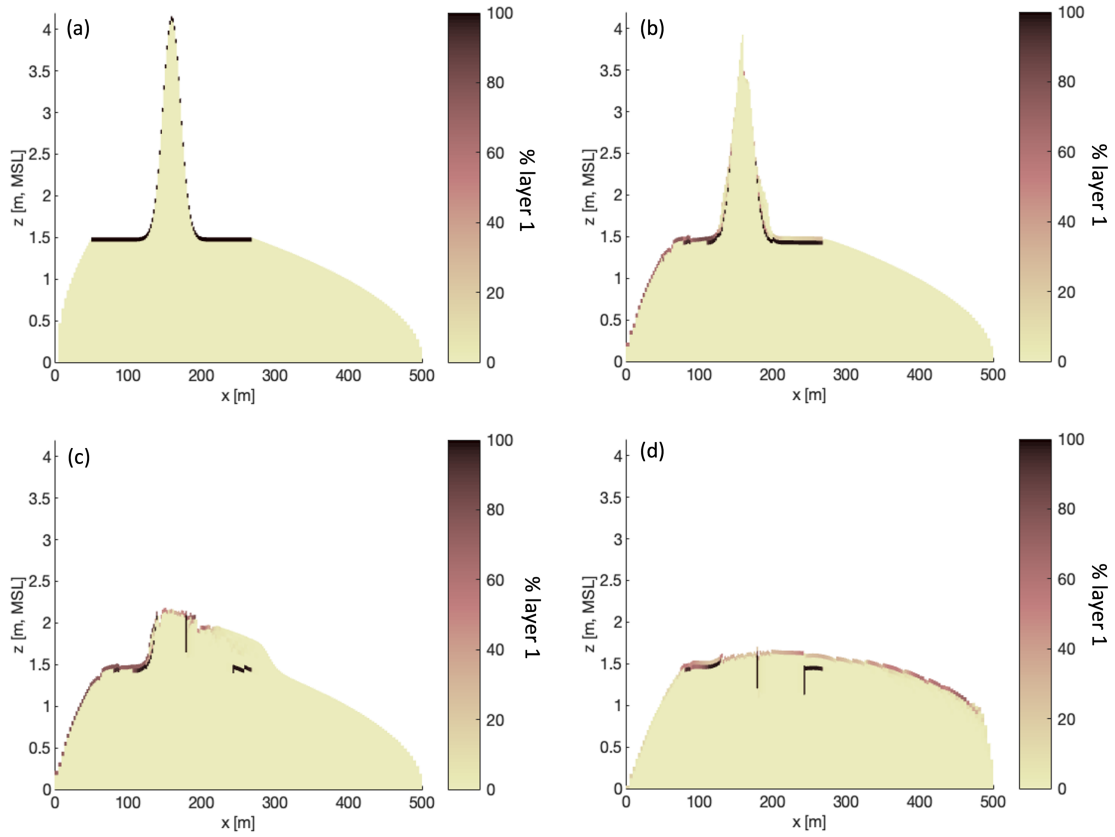

Figure S1: Simulated barrier-island profiles and percentage of material initially in the top bed layer distributed to other bed layers when  $z_d = 4.2$  m,  $x_c = 159$  m,  $d_{50} = 0.4$  mm,  $\Delta z_{gl} = 5$  cm for initial profile (a), profile after 3.0 hours (b), profile after 3.5 hours (c), final profile (d).

Table S1: XBeach model settings for sediment layers and avalanching.

| Parameter Name<br>(1)                                                         | Value Used (default value shown in parentheses)<br>(2) |
|-------------------------------------------------------------------------------|--------------------------------------------------------|
| Number of sediment classes, <i>ngd</i>                                        | 2 (default = 1)                                        |
| Number of sediment class layers, <i>nd</i>                                    | 10 (default = 3)                                       |
| Thickness of sediment class layers, <i>dzg</i>                                | 0.05 m (default = 0.10 m)                              |
| Sediment density, <i>rhos</i>                                                 | 2650 $kg/m^3$ (default = 2650 $kg/m^3$ )               |
| Porosity, <i>por</i>                                                          | 0.4 (default = 0.4)                                    |
| Morphological acceleration factor, <i>morfac</i>                              | 1 (off)                                                |
| Critical avalanching slope above water, <i>dryslp</i>                         | 1.0 (default = 1.0)                                    |
| Critical avalanching slope under water, <i>wetslp</i>                         | 0.1 (default = 0.30, XBeach manual; 0.15, BOI)         |
| Water depth at interface from <i>wetslp</i> to <i>dryslp</i> , <i>hswitch</i> | 0.1 m (default = 0.1 m)                                |
